# Supplementary material
Source: PubMed Central journal article supplement (PMC10394185)
Supplement: jmcp.2023.22331_s001.pdf [file jmcp.2023.22331_s001.pdf]

## **SUPPLEMENTARY MATERIALS**

### **Cost-effectiveness of the tubeless automated insulin delivery system vs standard of care in the management of type 1 diabetes in the United States**

Joseph E Biskupiak, PhD; Mafalda Ramos, MSc; Carol J Levy, MD, CDCES; Greg Forlenza, MD; Colin Hopley, MSc; Jennifer Boyd, MMSc; Dan Swift, MSc; Mark Lamotte, MD; Diana I Brixner, PhD

**SUPPLEMENTARY TABLE 1** Baseline Characteristics (Base-Case Population)

**SUPPLEMENTARY TABLE 2** Baseline Characteristics (TBR  $\geq$  4%)

**SUPPLEMENTARY TABLE 3** Baseline Characteristics (HbA1c  $\geq$  8%)

**SUPPLEMENTARY TABLE 4** For Comparison: Treatment Effects Reported in Brown et al (2021)<sup>1</sup> Study

**SUPPLEMENTARY TABLE 5** Insulin Use (Units/Day) in Children and Adults

**SUPPLEMENTARY TABLE 6** Economic Input Parameters Used in IQVIA CDM (USD)

**SUPPLEMENTARY TABLE 7** Utility Inputs for Cost-Effectiveness Analysis in the IQVIA CDM

**SUPPLEMENTARY TABLE 8** Number of Events Per 1,000 Patient-Years (Base Case) Children and Adolescents

**SUPPLEMENTARY TABLE 9** Number of Events per 1,000 Patient-Years (Base Case) –Adults

**SUPPLEMENTARY TABLE 10** Cost-Effectiveness Scenario Analyses in Children and Adolescents (Base-Case Population)

**SUPPLEMENTARY TABLE 11** Cost-Effectiveness Scenario Analyses in Adults (Base-Case Population)

**SUPPLEMENTARY FIGURE 1** Cost-Effectiveness Scatterplots and Cost-Effectiveness Acceptability Curves (Comparing Tubeless AID vs SoC, NSHE  $<$ 70mg/dL)

**Supplementary Table 1. Baseline characteristics (base-case population)**

| Characteristics              | Children (6-17.9 years) |              | Adults (18-70 years) |              | Units/Range                   |
|------------------------------|-------------------------|--------------|----------------------|--------------|-------------------------------|
|                              | Mean                    | SE/SD        | Mean                 | SE/SD        |                               |
| N                            | 125                     |              | 115                  |              |                               |
| <b>PATIENT DEMOGRAPHICS</b>  |                         |              |                      |              |                               |
| <i>Start Age</i>             | <i>10.90</i>            | <i>2.70</i>  | <i>39.30</i>         | <i>12.70</i> | Years                         |
| <i>Duration of Diabetes</i>  | <i>5.10</i>             | <i>3.00</i>  | <i>19.00</i>         | <i>11.70</i> | Years                         |
| <i>Proportion of males</i>   | <i>47.20</i>            |              | <i>37.40</i>         |              | %                             |
| <b>BASELINE RISK FACTORS</b> |                         |              |                      |              |                               |
| <i>HbA1c</i>                 | <i>7.65</i>             | <i>0.94</i>  | <i>7.13</i>          | <i>0.86</i>  | %-points                      |
| <i>SBP</i>                   | <i>109.00</i>           | <i>10.00</i> | <i>123.00</i>        | <i>14.00</i> | mmHg                          |
| <i>DBP</i>                   | <i>65.00</i>            | <i>8.00</i>  | <i>76.00</i>         | <i>9.00</i>  | mmHg                          |
| <i>T-CHOL</i>                | <i>180.10</i>           | <i>36.43</i> | <i>180.10</i>        | <i>36.43</i> | mg/dL                         |
| <i>HDL</i>                   | <i>61.60</i>            | <i>14.60</i> | <i>61.60</i>         | <i>14.60</i> | mg/dL                         |
| <i>LDL</i>                   | <i>100.00</i>           | <i>32.50</i> | <i>100.00</i>        | <i>32.50</i> | mg/dL                         |
| <i>TRIG</i>                  | <i>93.30</i>            | <i>45.70</i> | <i>93.30</i>         | <i>45.70</i> | mg/dL                         |
| <i>BMI</i>                   | <i>19.01</i>            | <i>3.42</i>  | <i>27.01</i>         | <i>4.67</i>  | kg/m <sup>2</sup>             |
| <i>eGFR</i>                  | <i>97.80</i>            | <i>19.30</i> | <i>97.80</i>         | <i>19.30</i> | ml/min/<br>1.73m <sup>2</sup> |
| <i>HAEM</i>                  | <i>14.20</i>            | <i>1.35</i>  | <i>14.20</i>         | <i>1.35</i>  | gr/dL                         |
| <i>WBC</i>                   | <i>6.80</i>             | <i>0.00</i>  | <i>6.80</i>          | <i>0.00</i>  | 10 <sup>6</sup> /ml           |
| <i>Heart rate</i>            | <i>75.10</i>            | <i>10.40</i> | <i>75.10</i>         | <i>10.40</i> | bpm                           |
| <i>WHR</i>                   | <i>0.90</i>             | <i>0.00</i>  | <i>0.90</i>          | <i>0.00</i>  | (1 unit)                      |
| <i>uACR</i>                  | <i>5.62</i>             | <i>1.54</i>  | <i>5.62</i>          | <i>1.54</i>  | mg/mmol                       |
| <i>Serum creatinine</i>      | <i>0.86</i>             | <i>0.02</i>  | <i>0.86</i>          | <i>0.02</i>  | mg/dL                         |
| <i>Serum albumin</i>         | <i>3.90</i>             | <i>0.00</i>  | <i>3.90</i>          | <i>0.00</i>  | g/dL                          |
| <i>Smoker*</i>               | <i>0.00</i>             |              | <i>0.10</i>          |              | %                             |
| <i>Cigarettes/day*</i>       | <i>0.00</i>             |              | <i>11.00</i>         |              |                               |

|                                           |      |  |       |  |         |
|-------------------------------------------|------|--|-------|--|---------|
| Alcohol consumption*                      | 0.00 |  | 9.00  |  | Oz/week |
| <b>RACIAL CHARACTERISTICS</b>             |      |  |       |  |         |
| White                                     | 84.8 |  | 86.43 |  | %       |
| Black                                     | 4.46 |  | 3.91  |  | %       |
| Hispanic                                  | 7.14 |  | 7.81  |  | %       |
| Asian/Pacific Islander                    | 3.57 |  | 1.85  |  | %       |
| <b>BASELINE CVD COMPLICATIONS</b>         |      |  |       |  |         |
| MI                                        | 0.00 |  | 3.70  |  | %       |
| Angina                                    | 0.00 |  | 3.70  |  | %       |
| PVD                                       | 0.00 |  | 2.50  |  | %       |
| Stroke                                    | 0.00 |  | 2.50  |  | %       |
| <b>BASELINE RENAL COMPLICATIONS</b>       |      |  |       |  |         |
| Microalbuminuria                          | 0.00 |  | 11.60 |  | %       |
| Gross proteinuria                         | 0.00 |  | 2.90  |  | %       |
| ESRD                                      | 0.00 |  | 0.40  |  | %       |
| <b>BASELINE RETINOPATHY COMPLICATIONS</b> |      |  |       |  |         |
| BDR                                       | 0.00 |  | 32    |  | %       |
| <b>BASELINE MACULAR EDEMA</b>             |      |  |       |  |         |
| ME                                        | 0.00 |  | 0.4   |  | %       |
| <b>BASELINE CATARACT</b>                  |      |  |       |  |         |
| Cataract                                  | 0.00 |  | 4.3   |  | %       |
| <b>BASELINE FOOT ULCER COMPLICATIONS</b>  |      |  |       |  |         |
| History of ulcer                          | 0.00 |  | 3.7   |  | %       |
| <b>BASELINE NEUROPATHY</b>                |      |  |       |  |         |
| Neuropathy                                | 0.00 |  | 22.8  |  | %       |

Values in italics are data on file.

Rest comes from EASE 3<sup>2</sup>.

\*Assumptions.

Abbreviations: BDR, background diabetic retinopathy; BMI, body mass index; CDM, Core Diabetes Model; Creat, creatinine; DBP, diastolic blood pressure; eGFR, estimated glomerular filtration rate; ESRD, end-stage renal disease; HAEM, hemoglobin; HbA1c, glycated hemoglobin; HDL, high-density lipoprotein; LDL, low-density lipoprotein; ME, macular edema; MI, myocardial infraction; NICE: National Institute for Health and Care Excellence; PVD, peripheral vascular disease; SBP, systolic blood pressure; SD, standard deviation; SE, standard error; T-Chol, total cholesterol; TRIG, triglycerides; uACR, urine albumin-to-creatinine ratio; WBC, white blood count; WHR, waist-to-hip ratio.

Microalbuminuria: between 30 and 300mg/24h; Gross proteinuria: > 300 mg/24h

**Supplementary Table 2. Baseline characteristics (TBR  $\geq$  4%)**

| Characteristics              | Children (6-17.9 years) |       | Adults (18-70 years) |       | Units/Range       |
|------------------------------|-------------------------|-------|----------------------|-------|-------------------|
|                              | Mean                    | SE/SD | Mean                 | SE/SD |                   |
| N                            | 21                      |       | 31                   |       |                   |
| <b>PATIENT DEMOGRAPHICS</b>  |                         |       |                      |       |                   |
| Start age                    | 10.70                   | 3.00  | 39.4                 | 13.7  | years             |
| Duration of Diabetes         | 4.90                    | 2.50  | 21.9                 | 11.4  | years             |
| Male                         | 33.30                   |       | 48.4                 |       | %                 |
| <b>BASELINE RISK FACTORS</b> |                         |       |                      |       |                   |
| HbA1c                        | 7.14                    | 0.7   | 7.0                  | 0.8   | %-points          |
| SBP                          | 107.00                  | 9     | 126                  | 14    | mmHg              |
| DBP                          | 64.00                   | 5     | 74                   | 9     | mmHg              |
| BMI                          | 18.26                   | 3.0   | 27.4                 | 4.4   | kg/m <sup>2</sup> |

Note: data on file. For cohort (TBR>4%), only data different from those provided in Supplementary Table 1 were reported.

Abbreviations: BMI, body mass index; DBP, diastolic blood pressure; HbA1c, glycated hemoglobin; SBP, systolic blood pressure; SD, standard deviation; SE, standard error; TBR, time below range.

**Supplementary Table 3. Baseline characteristics (HbA1c ≥ 8%)**

| Characteristics              | Children (6-17.9 years) |       | Adults (18.0-70 years) |       | Units/Range       |
|------------------------------|-------------------------|-------|------------------------|-------|-------------------|
|                              | Mean                    | SE/SD | Mean                   | SE/SD |                   |
| N                            | 44                      |       | 18                     |       |                   |
| <b>PATIENT DEMOGRAPHICS</b>  |                         |       |                        |       |                   |
| Start age                    | 11.5                    | 2.8   | 32.7                   | 13.0  | years             |
| Duration of Diabetes         | 5.5                     | 2.9   | 14.2                   | 10.9  | years             |
| Males                        | 40.9                    |       | 22.2                   |       | %                 |
| <b>BASELINE RISK FACTORS</b> |                         |       |                        |       |                   |
| HbA1c                        | 8.7                     | 0.6   | 8.6                    | 0.4   | %-points          |
| SBP                          | 110                     | 11    | 118                    | 12    | mmHg              |
| DBP                          | 65                      | 9     | 75                     | 9     | mmHg              |
| BMI                          | 19.9                    | 4.4   | 28.1                   | 6.5   | kg/m <sup>2</sup> |

Note: data on file. For cohort (HbA1c>8%), only data different from those provided in Supplementary Table 1 were reported.

Abbreviations: BMI, body mass index; DBP, diastolic blood pressure; HbA1c, glycated hemoglobin; SBP, systolic blood pressure; SD, standard deviation; SE, standard error.

**Supplementary Table 4. For comparison: Treatment effects reported in Brown et al (2021)<sup>1</sup> study**

| Parameter (units)                                                        | Children (6-13.9 years) |              | Adolescents and Adults (14-70 years) |              |
|--------------------------------------------------------------------------|-------------------------|--------------|--------------------------------------|--------------|
|                                                                          | SoC                     | Tubeless AID | SoC                                  | Tubeless AID |
|                                                                          | Mean (SD)               |              |                                      |              |
| <i>Base-case</i>                                                         |                         |              |                                      |              |
| Change in baseline HbA1c (%)                                             | 0.00                    | -0.71 (0.63) | 0.00                                 | -0.38 (0.54) |
| NSHE < 70 mg/dl (/100 patient-years) event rate                          | 27,540                  | 27,357       | 29,658                               | 18,189       |
| NSHE < 54 mg/dl (/100 patient-years) event rate                          | 5,150                   | 5,296        | 6,867                                | 3,470        |
| SHE 1 (requiring non-medical assistance) (/100 patient-years) event rate | 15.60                   | 3.60         | 26.34                                | 6.00         |
| Diabetic keto-acidosis event rate (/100 patient-years) event rate        | 25.2                    | 4.8          | 10.8                                 | 1.2          |

Abbreviations: HbA1c, glycated hemoglobin; NSHE, non-severe hypoglycemia event rate; SD, standard deviation; SHE, severe hypoglycemic event; SoC; standard of care. AID automated insulin delivery.

**Supplementary Table 5. Insulin use (units/day) in children and adults**

|                          | <b>Children (6-17.9 years)</b> |           |                     |           | <b>Adults (18-70 years)</b> |           |                     |           |
|--------------------------|--------------------------------|-----------|---------------------|-----------|-----------------------------|-----------|---------------------|-----------|
|                          | <b>SoC</b>                     |           | <b>Tubeless AID</b> |           | <b>SoC</b>                  |           | <b>Tubeless AID</b> |           |
|                          | <b>Mean</b>                    | <b>SD</b> | <b>Mean</b>         | <b>SD</b> | <b>Mean</b>                 | <b>SD</b> | <b>Mean</b>         | <b>SD</b> |
| <b><i>Base-case</i></b>  |                                |           |                     |           |                             |           |                     |           |
| Basal                    | 16.00                          | 9.00      | 20.00               | 10.50     | 23.80                       | 10.90     | 22.90               | 10.20     |
| Bolus                    | 20.90                          | 11.70     | 19.30               | 10.10     | 23.10                       | 13.70     | 22.10               | 9.80      |
| <b><i>TBR ≥ 4%</i></b>   |                                |           |                     |           |                             |           |                     |           |
| Basal                    | 14.00                          | 6.70      | 14.40               | 6.50      | 24.50                       | 10.10     | 22.30               | 9.50      |
| Bolus                    | 17.00                          | 7.90      | 17.20               | 7.90      | 26.00                       | 13.30     | 25.10               | 10.40     |
| <b><i>HbA1c ≥ 8%</i></b> |                                |           |                     |           |                             |           |                     |           |
| Basal                    | 16.70                          | 9.90      | 24.10               | 11.20     | 30.80                       | 17.60     | 32.00               | 12.20     |
| Bolus                    | 23.30                          | 11.30     | 21.60               | 11.40     | 28.40                       | 21.10     | 24.30               | 14.60     |

Abbreviations: HbA1c, glycated hemoglobin; SD, standard deviation; SoC, standard of care;

AID automated insulin delivery; TBR, time below range.



**Supplementary Table 6. Economic input parameters used in IQVIA CDM (USD)**

| Variable                        | Description                                                                                                    | Value<br>(USD-\$) | References/Notes                                                                                                                                                                    |
|---------------------------------|----------------------------------------------------------------------------------------------------------------|-------------------|-------------------------------------------------------------------------------------------------------------------------------------------------------------------------------------|
| <b>Discounting</b>              |                                                                                                                |                   |                                                                                                                                                                                     |
| Costs discount rate             | The annual discount rate applied to economic outcomes                                                          | 3.0%              | Sanders <i>et al</i> 2016 <sup>3</sup>                                                                                                                                              |
| Clinical outcomes discount rate | The annual discount rate applied to life expectancy and QALE outcomes                                          | 3.0%              | Sanders <i>et al</i> 2016 <sup>3</sup>                                                                                                                                              |
| <b>Management costs</b>         |                                                                                                                |                   |                                                                                                                                                                                     |
| Annual statins treatment        | Annual cost for statin treatment (applied if patient is on 1 <sup>o</sup> or 2 <sup>o</sup> prevention)        | 41.31             | Simvastatin 40 mg assumed using MIDAS data to determine the most commonly prescribed statin <sup>4</sup>                                                                            |
| Annual aspirin treatment        | Annual cost for aspirin treatment (applied if patient is on 1 <sup>o</sup> or 2 <sup>o</sup> prevention)       | 0.00              | Aspirin is not covered by payers                                                                                                                                                    |
| Annual ACE inhibitor treatment  | Annual cost for ACE inhibitor treatment (applied if patient is on 1 <sup>o</sup> or 2 <sup>o</sup> prevention) | 16.55             | Lisinopril 10 mg assumed using MIDAS data to determine the most commonly prescribed ACE inhibitor. Price based on cheapest per pill price ( $\$0.0453 \times 365.25$ ) <sup>4</sup> |

|                                                    |                                                                                                   |           |                                                                                                                                                    |
|----------------------------------------------------|---------------------------------------------------------------------------------------------------|-----------|----------------------------------------------------------------------------------------------------------------------------------------------------|
| Annual screening for MA                            | Annual cost for MA screening (applied if patient is screened)                                     | 87.49     | MA screening includes: MA quantitative (CPT 82043) (\$6.42) and assay of urine creatinine (CPT 82570) (\$5.75) + a GP visit (\$75.32) <sup>5</sup> |
| Annual screening for GRP                           | Annual cost for MA (applied if patient is screened)                                               | 87.49     | Proteinuria screening includes: assay of urine albumin (CPT 82043) and assay of urine creatinine (CPT 82570) + a GP visit (\$75.32) <sup>5</sup>   |
| ACE inhibitor treatment discontinuation due to AEs | One off-event cost for stopping treatment with ACE inhibitors or ARB due to AEs                   | 75.32     | Assumes the cost of one physician visit (CPT 99213 ~15 minute visit) <sup>6</sup>                                                                  |
| Screening for retinopathy                          | Cost for an ophthalmologist visit for eye screening in diabetes-related diseases (assumed annual) | 141.28    | Eye screening involves: Fundus photography (CPT code 92250) and Physician visit (CPT code 92012) <sup>6</sup>                                      |
| <b>Direct cost of complications</b>                |                                                                                                   |           |                                                                                                                                                    |
| MI (1 <sup>st</sup> year)                          | Annual costs applied in the year MI occurs                                                        | 68,138.65 | Ward <i>et al</i> 2014 <sup>7</sup>                                                                                                                |
| MI (2 <sup>nd</sup> year)                          | Annual costs applied in the years after MI occurs                                                 | 2,298.45  | Ward <i>et al</i> 2014 <sup>7</sup>                                                                                                                |

|                                        |                                                                                |           |                                     |
|----------------------------------------|--------------------------------------------------------------------------------|-----------|-------------------------------------|
| Unstable Angina (1 <sup>st</sup> year) | Annual costs applied in the year unstable angina occurs                        | 25,840.66 | Ward <i>et al</i> 2014 <sup>7</sup> |
| c-angina (2 <sup>nd</sup> + year)      | Annual costs applied in the years after angina occurs                          | 2,298.45  | Ward <i>et al</i> 2014 <sup>7</sup> |
| CHF (1 <sup>st</sup> year)             | Annual costs applied in the year CHF occurs                                    | 28,679.92 | Ward <i>et al</i> 2014 <sup>7</sup> |
| CHF (2 <sup>nd</sup> year)             | Annual costs applied in the years after CHF occurs                             | 2,298.45  | Ward <i>et al</i> 2014 <sup>7</sup> |
| Stroke (1 <sup>st</sup> year)          | Annual costs applied in the year stroke occurs                                 | 50,844.75 | Ward <i>et al</i> 2014 <sup>7</sup> |
| Stroke (2 <sup>nd</sup> year)          | Annual costs applied in the years after stroke occurs                          | 18,759.41 | Ward <i>et al</i> 2014 <sup>7</sup> |
| Stroke death within 30 days            | Annual costs applied in the year stroke occurs and subject dies within 30 days | 22,737.03 | Ward <i>et al</i> 2014 <sup>7</sup> |

|                                            |                                                                                    |           |                                     |
|--------------------------------------------|------------------------------------------------------------------------------------|-----------|-------------------------------------|
| PVD (1 <sup>st</sup> year)                 | Annual costs applied in the year PVD occurs                                        | 5,832.29  | Yeaw <i>et al</i> 2014 <sup>8</sup> |
| PVD (2 <sup>nd</sup> year)                 | Annual costs applied in the years after PVD occurs                                 | 2,258.91  | Yeaw <i>et al</i> 2014 <sup>8</sup> |
| Hemodialysis (1 <sup>st</sup> year)        | Annual costs applied in the year ESRD occurs and is treated by hemodialysis        | 97,737.30 | US Renal Data System <sup>9</sup>   |
| Hemodialysis (2 <sup>nd</sup> year)        | Annual costs applied in the year after ESRD occurs and is treated by hemodialysis  | 97,737.30 | US Renal Data System <sup>9</sup>   |
| Peritoneal Dialysis (1 <sup>st</sup> year) | Annual costs applied in the year ESRD occurs and is treated by peritoneal dialysis | 81,842.94 | US Renal Data System <sup>9</sup>   |
| Peritoneal Dialysis (2 <sup>nd</sup> year) | Annual costs applied in the year after ESRD occurs and is treated by               | 81,842.94 | US Renal Data System <sup>9</sup>   |

|                                         |                                                                                                                     |           |                                       |
|-----------------------------------------|---------------------------------------------------------------------------------------------------------------------|-----------|---------------------------------------|
|                                         | peritoneal dialysis                                                                                                 |           |                                       |
| Renal transplant (1 <sup>st</sup> year) | Annual costs applied in the year ESRD occurs and is treated by renal transplant                                     | 99,745.45 | Matas <i>et al</i> 2015 <sup>10</sup> |
| Renal transplant (2 <sup>nd</sup> year) | Annual costs applied in the year after ESRD occurs and is treated by renal transplant                               | 30,598.37 | Matas <i>et al</i> 2015 <sup>10</sup> |
| Non-severe hypoglycemia                 | Cost for a non-severe hypoglycemic event (not requiring external assistance)                                        | 13.28     | Foos <i>et al</i> 2015 <sup>11</sup>  |
| Severe hypoglycemia Type 1              | Cost for a type 1 severe hypoglycemic event (not requiring medical assistance. e.g. from friends or family members) | 79.67     | Foos <i>et al</i> 2015 <sup>11</sup>  |

|                                                    |                                                                                                                             |          |                                                                                                                               |
|----------------------------------------------------|-----------------------------------------------------------------------------------------------------------------------------|----------|-------------------------------------------------------------------------------------------------------------------------------|
| Severe hypoglycemia type 2                         | Costs for a type 2 severe hypoglycemic event (requiring medical assistance e.g. health care practitioners, hospitalization) | 1,401.52 | Foos <i>et al</i> 2015 <sup>11</sup>                                                                                          |
| Diabetic ketoacidosis                              |                                                                                                                             | 19,543   | HCUP <sup>12</sup>                                                                                                            |
| Retinopathy laser treatment                        | Cost for laser treatment/retinal photocoagulation                                                                           | 684.03   | Includes cost for the treatment (CPT 67210) and the physician visit (CPT 92004) <sup>6</sup>                                  |
| Cataract surgical treatment (1 <sup>st</sup> year) | Cost for first or second cataract surgery in the first year                                                                 | 808.00   | Includes cost for the surgery (assumed outpatient or ambulatory) (CPT 66984) and the physician visit (CPT 92004) <sup>6</sup> |
| Cataract surgical treatment (2 <sup>nd</sup> year) | Cost for subsequent years after cataract surgery                                                                            | 164.31   | Yeaw <i>et al</i> 2014 <sup>8</sup>                                                                                           |
| Blindness (1 <sup>st</sup> year)                   | Annual cost applied in the year blindness occurs                                                                            | 3,454.92 | Ward <i>et al</i> 2014 <sup>7</sup>                                                                                           |
| Blindness (2 <sup>nd</sup> year)                   | Annual cost applied in the year after blindness occurs                                                                      | 3,454.92 | Ward <i>et al</i> 2014 <sup>7</sup>                                                                                           |

|                                   |                                                                                   |          |                                                                                                                                                                                                                   |
|-----------------------------------|-----------------------------------------------------------------------------------|----------|-------------------------------------------------------------------------------------------------------------------------------------------------------------------------------------------------------------------|
| Neuropathy (1 <sup>st</sup> year) | Annual cost applied in the year neuropathy occurs                                 | 2,230.07 | Yeaw <i>et al</i> 2014 <sup>8</sup>                                                                                                                                                                               |
| Neuropathy (2 <sup>nd</sup> year) | Annual cost applied in the year after neuropathy occurs                           | 286.87   | Includes symptomatic neuropathy and Office/outpatient visit cost (HCPCS code-95861 + 99214) <sup>6</sup>                                                                                                          |
| Active ulcer                      |                                                                                   | 6,711.52 | Yeaw <i>et al</i> 2014 <sup>8</sup>                                                                                                                                                                               |
| Amputation                        | Cost of amputation event (all medical costs except prosthesis)                    | 9,041.00 | Ward <i>et al</i> 2014 <sup>7</sup>                                                                                                                                                                               |
| Post amputation                   | Annual cost applied in the year after ulcer is healed and treated with amputation | 2,919.46 | The average cost of a prosthesis and ten visits for physical/occupational therapy (CPT 97761) (\$41.81*10) were included. Cost of prosthesis was \$1,935 (2010), which was inflated to 2019 cost <sup>13,14</sup> |

Abbreviations: ACE, Angiotensin-converting enzyme; AE, adverse event; ARB, Angiotensin receptor blockers; CHF, Congestive heart failure; ESRD, End-stage renal disease; GP, General practitioner; GRP, Gross renal proteinuria; MA, Microalbuminuria; MI, Myocardial infarction; PVD, Peripheral vascular disease; QALE, Quality-adjusted life expectancy; USD-\$, United States Dollar.

**Supplementary Table 7. Utility Inputs for cost-effectiveness analysis in the IQVIA CDM**

| <b>Quality-of-Life Utilities</b> | <b>Values</b> | <b>SE</b> | <b>Reference</b>                                                                     |
|----------------------------------|---------------|-----------|--------------------------------------------------------------------------------------|
| QoL T1 no complications          | 0.839         | 0.0048    | Peasgood <i>et al</i> 2016 <sup>15</sup>                                             |
| DisU MI event                    | -0.05500      | 0.0080    | Beaudet A <i>et al</i> 2011 <sup>16</sup>                                            |
| U post MI                        | 0.7840        | 0.0530    | Peasgood <i>et al</i> 2016 <sup>15</sup> , Beaudet A <i>et al</i> 2011 <sup>16</sup> |
| U angina                         | 0.7490        | 0.0043    | Peasgood <i>et al</i> 2016 <sup>15</sup> , Beaudet A <i>et al</i> 2011 <sup>16</sup> |
| U CHF                            | 0.7430        | 0.0042    | Currie <i>et al</i> 2006 <sup>17</sup>                                               |
| DisU stroke event                | -0.16400      | 0.0480    | Beaudet A <i>et al</i> 2011 <sup>16</sup>                                            |
| U post Stroke                    | 0.6750        | 0.0039    | Peasgood <i>et al</i> 2016 <sup>15</sup> , Beaudet A <i>et al</i> 2011 <sup>16</sup> |
| U PVD                            | 0.7780        | 0.0044    | Peasgood <i>et al</i> 2016 <sup>15</sup> , Beaudet A <i>et al</i> 2011 <sup>16</sup> |
| U MA                             | 0.8185        | 0.0047    | Peasgood <i>et al</i> 2016 <sup>15</sup> , Beaudet A <i>et al</i> 2011 <sup>16</sup> |
| U GRP                            | 0.7910        | 0.0045    | Peasgood <i>et al</i> 2016 <sup>15</sup> , Beaudet A <i>et al</i> 2011 <sup>16</sup> |
| U HD                             | 0.6350        | 0.0036    | Peasgood <i>et al</i> 2016 <sup>15</sup> , Beaudet A <i>et al</i> 2011 <sup>16</sup> |
| U PD                             | 0.6350        | 0.0036    | Peasgood <i>et al</i> 2016 <sup>15</sup> , Beaudet A <i>et al</i> 2011 <sup>16</sup> |
| U RT                             | 0.8293        | 0.0047    | Peasgood <i>et al</i> 2016 <sup>15</sup>                                             |
| U BDR                            | 0.8102        | 0.0046    | Peasgood <i>et al</i> 2016 <sup>15</sup>                                             |
| U BDR wrongly treated            | 0.8102        | 0.0046    | Peasgood <i>et al</i> 2016 <sup>15</sup>                                             |
| U PDR laser treated              | 0.7690        | 0.0044    | Peasgood <i>et al</i> 2016 <sup>15</sup> , Beaudet A <i>et al</i> 2011 <sup>16</sup> |
| U PDR no Laser                   | 0.7690        | 0.0044    | Peasgood <i>et al</i> 2016 <sup>15</sup> , Beaudet A <i>et al</i> 2011 <sup>16</sup> |



|                                     |          |        |                                                                                      |
|-------------------------------------|----------|--------|--------------------------------------------------------------------------------------|
| U ME                                | 0.7990   | 0.0040 | Peasgood <i>et al</i> 2016 <sup>15</sup> , Beaudet A <i>et al</i> 2011 <sup>16</sup> |
| U SVL                               | 0.7798   | 0.0045 | Peasgood <i>et al</i> 2016 <sup>15</sup>                                             |
| U cataract                          | 0.8230   | 0.0047 | Peasgood <i>et al</i> 2016 <sup>15</sup> , Beaudet A <i>et al</i> 2011 <sup>16</sup> |
| U neuropathy                        | 0.6029   | 0.0035 | Peasgood <i>et al</i> 2016 <sup>15</sup>                                             |
| DisU active ulcer                   | -0.12450 | 0.0041 | Peasgood <i>et al</i> 2016 <sup>15</sup>                                             |
| DisU amp event                      | -0.11720 | 0.052  | Peasgood <i>et al</i> 2016 <sup>15</sup>                                             |
| U post amputation                   | 0.7218   | 0.1987 | Peasgood <i>et al</i> 2016 <sup>15</sup>                                             |
| Diminishing NSHE disutility         | yes      |        | Lauridsen <i>et al</i> 2014 <sup>18</sup>                                            |
| DisU for SHE 1                      | -0.01370 | 0.0010 | Foos <i>et al</i> 2018 <sup>19</sup>                                                 |
| DisU for SHE 2                      | -0.05780 | 0.0010 | Foos <i>et al</i> 2018 <sup>19</sup>                                                 |
| DisU keto event                     | -0.0091  | 0.010  | Peasgood <i>et al</i> 2016 <sup>15</sup>                                             |
| DisU BMI above 25 kg/m <sup>2</sup> | -0.0028  | 0.0000 | Peasgood <i>et al</i> 2016 <sup>15</sup>                                             |

Abbreviations: Amp, amputation; BDR, background retinopathy; BMI, body mass index; CDM, core diabetes model; CHF, congestive heart failure, DisU, disutility of an event; GRP, gross renal proteinuria; HD, hemodialysis; U, health state utility; MA, Microalbuminuria; ME, macular edema; MI, myocardial infarction; NSHE, non-severe hypoglycemia; PD, peritoneal dialysis; PDR, proliferative diabetic retinopathy; PVD, peripheral vascular disease; QoL, quality-of-life; RT, renal transplant; PD, peritoneal dialysis; SVL, severe vision loss; SHE, severe hypoglycemia; T1, Type 1 diabetes.

**Supplementary Table 8. Number of events per 1,000 patient-years (base-case) – Children and adolescents**

| <b>Type of event</b>                        | <b>Tubeless AID</b> | <b>SoC</b> |
|---------------------------------------------|---------------------|------------|
| <b><i>Renal disease</i></b>                 |                     |            |
| Microalbuminuria                            | 12.36               | 14.28      |
| Gross proteinuria                           | 6.67                | 8.21       |
| End-stage renal disease                     | 2.23                | 2.87       |
| <b><i>Cardiovascular disease</i></b>        |                     |            |
| Peripheral vascular disease                 | 2.60                | 2.65       |
| Heart failure                               | 2.31                | 2.14       |
| Angina                                      | 9.11                | 9.08       |
| Stroke                                      | 2.26                | 2.11       |
| MI                                          | 10.29               | 10.01      |
| <b><i>Eye disease</i></b>                   |                     |            |
| Background diabetic retinopathy             | 17.58               | 19.00      |
| Proliferative diabetic retinopathy          | 11.64               | 13.72      |
| Macular edema                               | 12.05               | 13.73      |
| Severe vision loss                          | 9.78                | 11.41      |
| Cataract                                    | 6.07                | 6.13       |
| <b><i>Ulcer/amputation/neuropathy</i></b>   |                     |            |
| Ulcer                                       | 0.20                | 0.20       |
| Recurrent ulcer                             | 0.17                | 0.17       |
| 1 <sup>st</sup> amputation                  | 0.13                | 0.13       |
| 2 <sup>nd</sup> amputation                  | 0.08                | 0.08       |
| Neuropathy                                  | 14.27               | 15.59      |
| <b><i>Hypoglycemia (events/patient)</i></b> |                     |            |

|                                                                |       |        |
|----------------------------------------------------------------|-------|--------|
| Non-severe hypoglycemia<br>(NSHE <70)                          | 9,407 | 13,416 |
| Non-severe hypoglycemia<br>(NSHE <54)                          | 1,725 | 2,972  |
| Severe hypoglycemia 1<br>(requiring non-medical<br>assistance) | 3.65  | 13.10  |
| Severe hypoglycemia 2<br>(requiring medical assistance)        | 0.00  | 0.00   |
| Ketoacidosis                                                   | 0.25  | 4.98   |
| Other                                                          | 0.00  | 0.00   |

Abbreviations: NSHE, Non-severe hypoglycemia event; SoC, standard of care; AID automated insulin delivery.

**Supplementary Table 9. Number of events per 1,000 patient-years (base-case) - Adults**

| <b>Type of event</b>                        | <b>Tubeless AID</b> | <b>SoC</b> |
|---------------------------------------------|---------------------|------------|
| <b><i>Renal disease</i></b>                 |                     |            |
| Microalbuminuria                            | 10.01               | 12.14      |
| Gross proteinuria                           | 6.60                | 7.85       |
| End-stage renal disease                     | 3.12                | 3.55       |
| <b><i>Cardiovascular disease</i></b>        |                     |            |
| Peripheral vascular disease                 | 4.83                | 4.99       |
| Heart failure                               | 3.71                | 3.85       |
| Angina                                      | 8.56                | 8.75       |
| Stroke                                      | 3.58                | 3.67       |
| MI                                          | 12.73               | 12.92      |
| <b><i>Eye disease</i></b>                   |                     |            |
| Background diabetic retinopathy             | 18.17               | 20.45      |
| Proliferative diabetic retinopathy          | 6.47                | 8.34       |
| Macular edema                               | 9.84                | 11.97      |
| Severe vision loss                          | 8.23                | 9.59       |
| Cataract                                    | 6.92                | 6.95       |
| <b><i>Ulcer/amputation/neuropathy</i></b>   |                     |            |
| Ulcer                                       | 0.37                | 0.39       |
| Recurrent ulcer                             | 1.36                | 1.43       |
| 1st amputation                              | 0.69                | 0.71       |
| 2nd amputation                              | 0.47                | 0.48       |
| Neuropathy                                  | 14.56               | 16.46      |
| <b><i>Hypoglycemia (events/patient)</i></b> |                     |            |
| Non-severe hypoglycemia (NSHE <70)          | 6,215               | 9,677      |

|                                                                |       |       |
|----------------------------------------------------------------|-------|-------|
| Non-severe hypoglycemia<br>(NSHE <54)                          | 1,115 | 2,181 |
| Severe hypoglycemia 1<br>(requiring non-medical<br>assistance) | 2.77  | 9.96  |
| Severe hypoglycemia 2<br>(requiring medical assistance)        | 0.00  | 0.00  |
| Ketoacidosis                                                   | 0     | 3.43  |
| Other                                                          | 0.00  | 0.00  |

Abbreviations: NSHE, Non-severe hypoglycemia event; SoC, standard of care; AID automated insulin delivery.

**Supplementary Table 10. Cost-effectiveness scenario analyses in children and adolescents (base-case population)**

| Scenarios                | NSHE < 54 mg/dL      | NSHE < 70 mg/dL      |
|--------------------------|----------------------|----------------------|
|                          | Tubeless AID vs. SoC | Tubeless AID vs. SoC |
| <b>Base-case</b>         |                      |                      |
| Incremental LY (years)   | 1.375                | 1.375                |
| Incremental QALY (years) | 1.521                | 1.519                |
| Incremental costs (\$)   | 15,099               | -2,483               |
| ICER (\$/QALY gained)    | 9,927                | Dominant             |
| NMB                      | 137,001              | 154,383              |
| <b>EDIC</b>              |                      |                      |
| Incremental LY (years)   | 1.564                | 1.564                |
| Incremental QALY (years) | 1.692                | 1.686                |
| Incremental costs (\$)   | 14,259               | -3,992               |
| ICER (\$/QALY gained)    | 8,427                | Dominant             |
| NMB                      | 154,941              | 172,592              |
| <b>SweNDR</b>            |                      |                      |
| Incremental LY (years)   | 1.237                | 1.237                |
| Incremental QALY (years) | 1.152                | 1.155                |
| Incremental costs (\$)   | 22,971               | 5,030                |
| ICER (\$/QALY gained)    | 19,940               | 4,355                |
| NMB                      | 92,229               | 110,470              |
| <b>5 years</b>           |                      |                      |
| Incremental LY (years)   | 0.034                | -                    |
| Incremental QALY (years) | 0.050                | -                    |
| Incremental costs (\$)   | 1,985                | -                    |

|                          |         |   |
|--------------------------|---------|---|
| ICER (\$/QALY gained)    | 39,704  | - |
| NMB                      | 3,015   | - |
| <b>10 years</b>          |         |   |
| Incremental LY (years)   | 0.116   | - |
| Incremental QALY (years) | 0.190   | - |
| Incremental costs (\$)   | 2,820   | - |
| ICER (\$/QALY gained)    | 14,844  | - |
| NMB                      | 16,180  | - |
| <b>20 years</b>          |         |   |
| Incremental LY (years)   | 0.369   | - |
| Incremental QALY (years) | 0.560   | - |
| Incremental costs (\$)   | 3,876   | - |
| ICER (\$/QALY gained)    | 6,922   | - |
| NMB                      | 52,124  | - |
| <b>40 years</b>          |         |   |
| Incremental LY (years)   | 0.957   | - |
| Incremental QALY (years) | 1.198   | - |
| Incremental costs (\$)   | 8,188   | - |
| ICER (\$/QALY gained)    | 6,834   | - |
| NMB                      | 111,612 | - |
| <b>80 years</b>          |         |   |
| Incremental LY (years)   | 1.556   | - |
| Incremental QALY (years) | 1.646   | - |
| Incremental costs (\$)   | 19,656  | - |
| ICER (\$/QALY gained)    | 11,942  | - |
| NMB                      | 144,944 | - |

| <b>Assuming all severe hypoglycemic events need medical attention</b>            |         |          |
|----------------------------------------------------------------------------------|---------|----------|
| Incremental LY (years)                                                           | 1.375   | 1.375    |
| Incremental QALY (years)                                                         | 1.730   | 1.729    |
| Incremental costs (\$)                                                           | 8,842   | -8,740   |
| ICER (\$/QALY gained)                                                            | 5,111   | Dominant |
| NMB                                                                              | 164,158 | 181,640  |
| <b>No cost for DKA</b>                                                           |         |          |
| Incremental LY (years)                                                           | 1.375   | 1.375    |
| Incremental QALY (years)                                                         | 1.521   | 1.519    |
| Incremental costs (\$)                                                           | 62,138  | 44,556   |
| ICER (\$/QALY gained)                                                            | 40,853  | 29,332   |
| NMB                                                                              | 89,962  | 107,344  |
| <b>Impact on HbA1c reduced with 50% (-0.690% to -0.345%)</b>                     |         |          |
| Incremental LY (years)                                                           | 1.337   |          |
| Incremental QALY (years)                                                         | 1.358   |          |
| Incremental costs (\$)                                                           | 19,408  |          |
| ICER (\$/QALY gained)                                                            | 14,292  |          |
| NMB                                                                              | 116,392 |          |
| <b>Impact on NSHE removed during childhood and reduced with 50% above age 18</b> |         |          |
| Incremental LY (years)                                                           | 1.375   |          |
| Incremental QALY (years)                                                         | 1.389   |          |
| Incremental costs (\$)                                                           | 19,229  |          |
| ICER (\$/QALY gained)                                                            | 13,844  |          |
| NMB                                                                              | 119,671 |          |
| <b>Subgroup HbA1c <math>\geq</math> 8%</b>                                       |         |          |
| Incremental LY (years)                                                           | 1.276   | 1.276    |



|                                                  |          |          |
|--------------------------------------------------|----------|----------|
| Incremental QALY (years)                         | 1.813    | 1.837    |
| Incremental costs (\$)                           | 15,745   | -957     |
| ICER (\$/QALY gained)                            | 8,684    | Dominant |
| NMB                                              | 165,555  | 184,657  |
| <b>Subgroup TBR <math>\geq</math> 4% of time</b> |          |          |
| Incremental LY (years)                           | 1.459    | 1.459    |
| Incremental QALY (years)                         | 1.733    | 1.302    |
| Incremental costs (\$)                           | -8,452   | 10,561   |
| ICER (\$/QALY gained)                            | Dominant | 8,111    |
| NMB                                              | 181,752  | 119,639  |

Abbreviations: DKA: Diabetes ketoacidosis; EDIC, Epidemiology of Diabetes Interventions and Complications; HbA1c, glycated hemoglobin; ICER, incremental cost-effectiveness ratio; LY, Life-years; NMB, net monetary benefit; QALY, quality-adjusted life-years; SHE, severe hypoglycemia event; SweNDR, Swedish national diabetes registry; AID automated insulin delivery; TBR: Time Below Range; USD-\$, United States Dollar.

**Supplementary Table 11. Cost-effectiveness scenario analyses in adults (base-case population)**

| Scenarios                | NSHE < 54 mg/dL      | NSHE < 70 mg/dL      |
|--------------------------|----------------------|----------------------|
|                          | Tubeless AID vs. SoC | Tubeless AID vs. SoC |
| <b>1. Base-case</b>      |                      |                      |
| Incremental LY (years)   | 1.022                | 1.022                |
| Incremental QALY (years) | 1.112                | 1.123                |
| Incremental costs (\$)   | 11,465               | -8,029               |
| ICER (\$/QALY gained)    | 10,310               | Dominant             |
| NMB                      | 99,735               | 120,329              |
| <b>2. Pittsburg</b>      |                      |                      |
| Incremental LY (years)   | 0.765                | 0.765                |
| Incremental QALY (years) | 0.898                | 0.913                |
| Incremental costs (\$)   | 9,468                | -8,515               |
| ICER (\$/QALY gained)    | 10,548               | Dominant             |
| NMB                      | 80,332               | 99,815               |
| <b>3. SweNDR</b>         |                      |                      |
| Incremental LY (years)   | 0.857                | 0.857                |
| Incremental QALY (years) | 0.903                | 0.919                |
| Incremental costs (\$)   | 13,545               | -6,111               |
| ICER (\$/QALY gained)    | 15,000               | Dominant             |
| NMB                      | 76,755               | 98,011               |
| <b>4. 5 years</b>        |                      |                      |
| Incremental LY (years)   | 0.039                | -                    |
| Incremental QALY (years) | 0.108                | -                    |
| Incremental costs (\$)   | -1,054               | -                    |

|                          |          |   |
|--------------------------|----------|---|
| ICER (\$/QALY gained)    | Dominant | - |
| NMB                      | 11,854   | - |
| <b>5. 10 years</b>       |          |   |
| Incremental LY (years)   | 0.123    | - |
| Incremental QALY (years) | 0.246    | - |
| Incremental costs (\$)   | -1,244   | - |
| ICER (\$/QALY gained)    | Dominant | - |
| NMB                      | 25,844   | - |
| <b>6. 20 years</b>       |          |   |
| Incremental LY (years)   | 0.386    | - |
| Incremental QALY (years) | 0.553    | - |
| Incremental costs (\$)   | 1,430    | - |
| ICER (\$/QALY gained)    | 2,585    | - |
| NMB                      | 53,870   | - |
| <b>7. 40 years</b>       |          |   |
| Incremental LY (years)   | 0.871    | - |
| Incremental QALY (years) | 1.005    | - |
| Incremental costs (\$)   | 7,981    | - |
| ICER (\$/QALY gained)    | 7,941    | - |
| NMB                      | 92,519   | - |
| <b>8. 80 years</b>       |          |   |
| Incremental LY (years)   | 1.015    | - |
| Incremental QALY (years) | 1.111    | - |
| Incremental costs (\$)   | 11,704   | - |
| ICER (\$/QALY gained)    | 10,535   | - |
| NMB                      | 99,396   | - |

| <b>Assuming all severe hypoglycemic events need medical attention</b> |         |          |
|-----------------------------------------------------------------------|---------|----------|
| Incremental LY (years)                                                | 1.022   | 1.022    |
| Incremental QALY (years)                                              | 1.301   | 1.312    |
| Incremental costs (\$)                                                | 5,805   | -13,689  |
| ICER (\$/QALY gained)                                                 | 4,462   | Dominant |
| NMB                                                                   | 124,295 | 144,889  |
| <b>No cost for DKA</b>                                                |         |          |
| Incremental LY (years)                                                | 1.022   | 1.022    |
| Incremental QALY (years)                                              | 1.112   | 1.123    |
| Incremental costs (\$)                                                | 51,036  | 31,541   |
| ICER (\$/QALY gained)                                                 | 46,896  | 28,086   |
| NMB                                                                   | 60,164  | 80,759   |
| <b>Impact on HbA1c reduced with 50% (-0.360% to -0.180%)</b>          |         |          |
| Incremental LY (years)                                                | 0.957   |          |
| Incremental QALY (years)                                              | 1.022   |          |
| Incremental costs (\$)                                                | 12,763  |          |
| ICER (\$/QALY gained)                                                 | 12,488  |          |
| NMB                                                                   | 89,437  |          |
| <b>Impact on NSHE reduced with 50%</b>                                |         |          |
| Incremental LY (years)                                                | 1.022   |          |
| Incremental QALY (years)                                              | 0.974   |          |
| Incremental costs (\$)                                                | 15,746  |          |
| ICER (\$/QALY gained)                                                 | 16,167  |          |
| NMB                                                                   | 81,654  |          |
| <b>Subgroup HbA1c ≥ 8%</b>                                            |         |          |
| Incremental LY (years)                                                | 1.513   | 1.513    |

|                                                  |          |         |
|--------------------------------------------------|----------|---------|
| Incremental QALY (years)                         | 1.687    | 1.748   |
| Incremental costs (\$)                           | 23,510   | 1,963   |
| ICER (\$/QALY gained)                            | 13,936   | 1,123   |
| NMB                                              | 145,190  | 172,838 |
| <b>Subgroup TBR <math>\geq</math> 4% of time</b> |          |         |
| Incremental LY (years)                           | 0.989    | 0.989   |
| Incremental QALY (years)                         | 1.243    | 0.881   |
| Incremental costs (\$)                           | -5,314   | 6,377   |
| ICER (\$/QALY gained)                            | Dominant | 7,238   |
| NMB                                              | 129,614  | 81,723  |

Abbreviations: DKA: Diabetes Ketoacidosis; HbA1c, glycated hemoglobin; ICER, incremental cost-effectiveness ratio; LY, Life-years; NMB, net monetary benefit; QALY, quality-adjusted life-years; SHE, severe hypoglycemia event; SweNDR, Swedish national diabetes registry; AID automated insulin delivery; TBR: Time Below Range; USD-\$, United States Dollar.

**Supplementary Figure 1. Cost-effectiveness scatterplots and Cost-effectiveness acceptability curves (comparing tubeless AID vs SoC, NSHE <70mg/dL)**

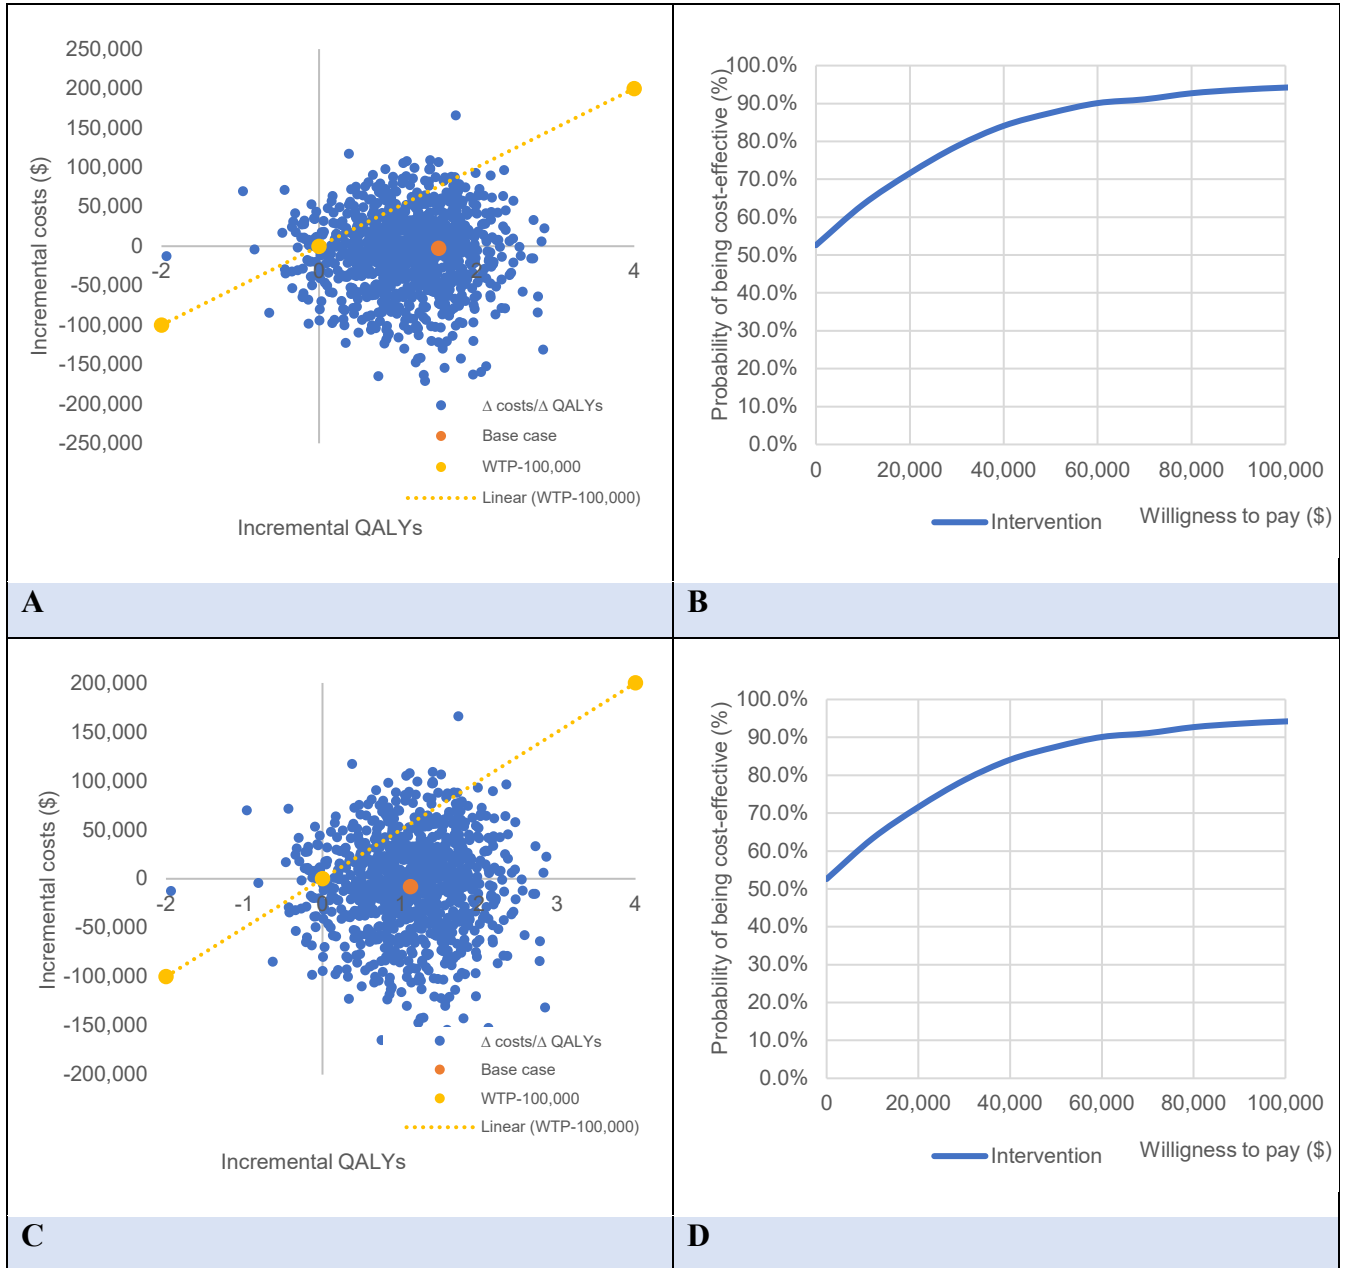

**A** Cost-effectiveness scatterplot for tubeless AID vs SoC (children with NSHE <70 mg/dL). **B** Cost-effectiveness acceptability curve for tubeless AID vs SoC (children with NSHE <70 mg/dL). **C** Cost-effectiveness scatterplot for tubeless AID vs SoC (adults with NSHE <70 mg/dL).

mg/dL). **D** Cost-effectiveness acceptability curve for tubeless AID vs SoC (adults with NSHE <70 mg/dL).

AID, automated insulin delivery; QALY: Quality-adjusted life-years; USD-\$, United States Dollar; WTP, willingness-to-pay.

## References

1. Brown SA, Forlenza GP, Bode BW, et al. Multicenter Trial of a Tubeless, On-Body Automated Insulin Delivery System With Customizable Glycemic Targets in Pediatric and Adult Participants With Type 1 Diabetes. *Diabetes Care*. 2021;44(7):1630-40.
2. Rosenstock J, Marquard J, Laffel LM, et al. Empagliflozin as Adjunctive to Insulin Therapy in Type 1 Diabetes: The EASE Trials. *Diabetes Care*. 2018;41(12):2560-69.
3. Sanders GD, Neumann PJ, Basu A, et al. Recommendations for Conduct, Methodological Practices, and Reporting of Cost-effectiveness Analyses: Second Panel on Cost-Effectiveness in Health and Medicine. *Jama*. 2016;316(10):1093-103.
4. Medi-span PriceRx. Wolters Kluwer Health. [Available from: <https://pricerx.medispan.com/login.aspx>. Accessed in July 2019. ].
5. Clinical Laboratory Fee Schedule. Centers for Medicare and Medicaid Services. [Available from: <https://www.cms.gov/Medicare/Medicare-Fee-for-Service-Payment/ClinicalLabFeeSched/Clinical-Laboratory-Fee-Schedule-Files.html>. Accessed in July, 2019.].
6. Medicare Physician Fee Schedule. Centers for Medicare and Medicaid Services. [Available from: <https://www.cms.gov/apps/physician-fee-schedule/search/search-criteria.aspx>. Accessed in July 2019.].
7. Ward A, Alvarez P, Vo L, Martin S. Direct medical costs of complications of diabetes in the United States: estimates for event-year and annual state costs (USD 2012). *J Med Econ*. 2014;17(3):176-83.
8. Yeaw J, Halinan S, Hines D, et al. Direct medical costs for complications among children and adults with diabetes in the US commercial payer setting. *Appl Health Econ Health Policy*. 2014;12(2):219-30.
9. US Renal Data System, Chapter 9: Healthcare Expenditures for Persons with ESRD. [Available from: [https://www.usrds.org/2018/download/v2\\_c09\\_ESRD\\_Costs\\_18\\_usrds.pdf](https://www.usrds.org/2018/download/v2_c09_ESRD_Costs_18_usrds.pdf)].

10. Matas AJ, Smith JM, Skeans MA, et al. OPTN/SRTR 2013 Annual Data Report: kidney. *Am J Transplant*. 2015;15(Suppl 2):1-34.
11. Foos V, Varol N, Curtis BH, et al. Economic impact of severe and non-severe hypoglycemia in patients with Type 1 and Type 2 diabetes in the United States. *J Med Econ*. 2015;18(6):420-32.
12. HCUP National Inpatient Sample (NIS). Healthcare Cost and Utilization Project (HCUP). 2017. Agency for Healthcare Research and Quality, Rockville, MD. [Available from: [www.hcup-us.ahrq.gov/nisoverview.jsp](http://www.hcup-us.ahrq.gov/nisoverview.jsp)].
13. Department of Health and Human Services. Questionable billing by suppliers of lower limb prosthesis. August 2011. [Available from: <https://oig.hhs.gov/oei/reports/oei-02-10-00170.pdf>. Accessed on May 1, 2015.].
14. K C. Older adults can thrive as prosthesis users. Senior Step. [Available from: [http://www.amputee-coalition.org/senior\\_step/older\\_prosthesis\\_users.html](http://www.amputee-coalition.org/senior_step/older_prosthesis_users.html). Accessed on May 1, 2015.].
15. Peasgood T, Brennan A, Mansell P, Elliott J, Basarir H, Kruger J. The Impact of Diabetes-Related Complications on Preference-Based Measures of Health-Related Quality of Life in Adults with Type I Diabetes. *Medical decision making : an international journal of the Society for Medical Decision Making*. 2016;36(8):1020-33.
16. Beaudet A, Palmer JL, Timlin L, et al. Cost-utility of exenatide once weekly compared with insulin glargine in patients with type 2 diabetes in the UK. *J Med Econ*. 2011;14(3):357-66.
17. Currie CJ, Morgan CL, Poole CD, Sharplin P, Lammert M, McEwan P. Multivariate models of health-related utility and the fear of hypoglycaemia in people with diabetes. *Curr Med Res Opin*. 2006;22(8):1523-34.
18. Lauridsen JT, Lønborg J, Gundgaard J, Jensen HH. Diminishing marginal disutility of hypoglycaemic events: results from a time trade-off survey in five countries. *Qual Life Res*. 2014;23(9):2645-50.
19. Foos V, McEwan P. Conversion of hypoglycemia utility decrements from categorical units reflecting event history into event specific disutility scores applicable to diabetes decision models. ISPOR 2018, May 19-23, 2018, Baltimore, MD, USA | PRM78.
